# Supplementary material for: pH-degradable and thermoresponsive water-soluble core cross-linked polymeric nanoparticles as potential drug delivery vehicle for doxorubicin
Source: Royal Society of Chemistry journal article supplement (doi:10.1039/c5ra17158j), 2015-01-01
Supplement: c5ra17158j1.pdf [file c5ra17158j1.pdf]

## Electronic Supplementary Information

### pH-Degradable and Thermoresponsive Water-Soluble Core Cross-Linked Polymeric Nanoparticles as Potential Drug Delivery Vehicle for Doxorubicin

Rakesh Banerjee <sup>†</sup>, Sheetal Parida <sup>‡</sup>, Chiranjit Maiti <sup>†</sup>, Mahitosh Mandal <sup>‡</sup> and Dibakar Dhara <sup>†,\*</sup>

<sup>†</sup> Department of Chemistry

<sup>‡</sup> School of Medical Science and Technology

Indian Institute of Technology Kharagpur

West Bengal 721302 India

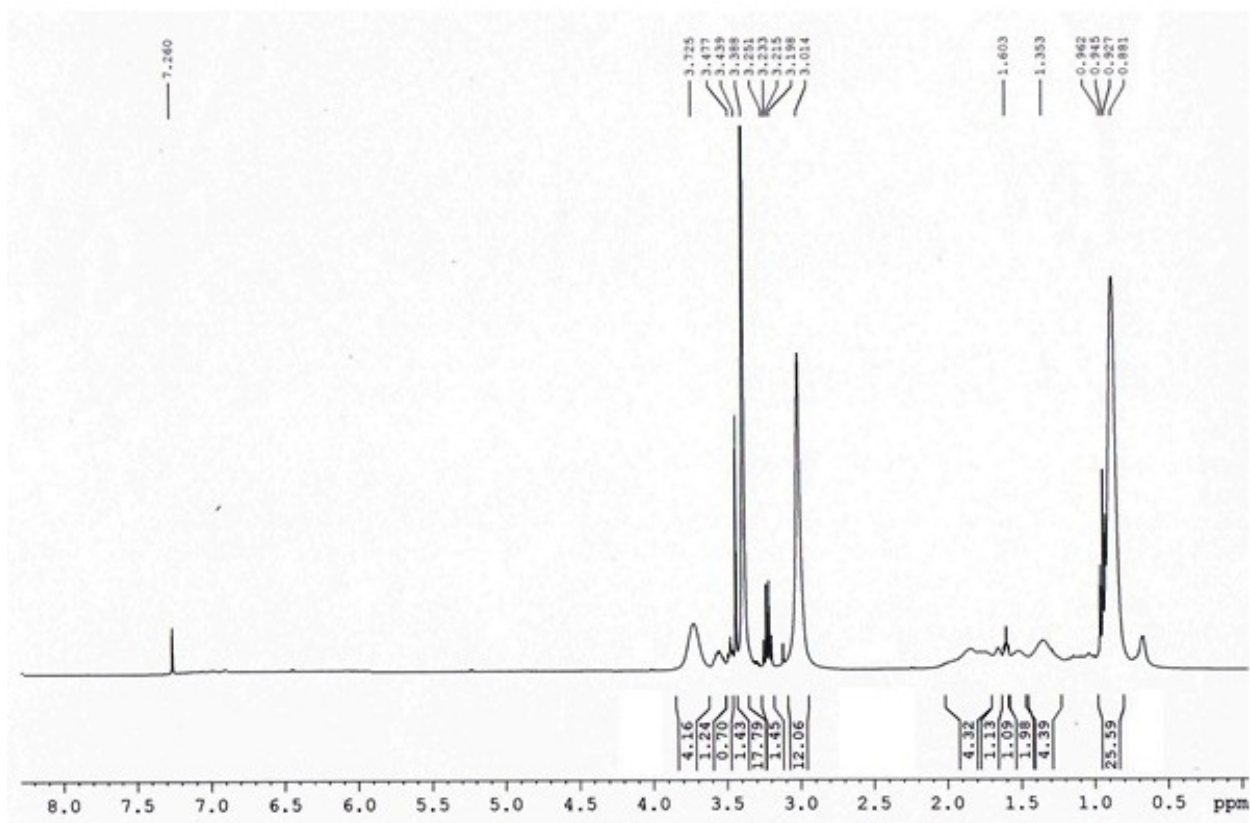

Figure S1: <sup>1</sup>H NMR of CLPN-1 in CDCl<sub>3</sub>.
